# Supplementary material for: Controllable dual-polarization valley physics in the strain-engineered 2D monolayer of VC2N4
Source: Royal Society of Chemistry journal article supplement (doi:10.1039/d3tc04255c), 2024-01-01
Supplement: d3tc04255c1.pdf [file d3tc04255c1.pdf]

**Controllable dual-polarization valley physics in strain engineered 2D monolayer of VC<sub>2</sub>N<sub>4</sub>**

Chengan Lei,<sup>a</sup> Shiyu Cao,<sup>a</sup> Zelong Gong,<sup>a</sup> Xinru Li,<sup>b</sup> Yandong Ma,<sup>b</sup> Jian Gao,<sup>a</sup> Jianqiang Bi,<sup>a</sup> Rajeev Ahuja,<sup>c</sup> Zhao Qian<sup>a,\*</sup>

<sup>a</sup>Key Laboratory for Liquid-Solid Structural Evolution and Processing of Materials (Ministry of Education), School of Materials Science and Engineering, Shandong University, Jinan 250061, China

<sup>b</sup>School of Physics, State Key Laboratory of Crystal Materials, Shandong University, Jinan 250100, China

<sup>c</sup>Condensed Matter Theory, Materials Theory Division, Department of Physics and Astronomy, Uppsala University, Uppsala 75120, Sweden

\*Corresponding author: qianzhao@sdu.edu.cn (Prof. Zhao Qian)

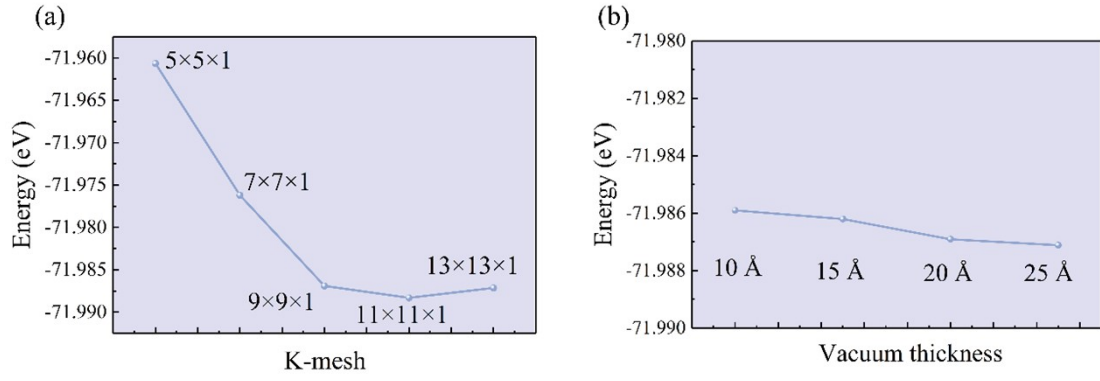

Fig. S1. The convergence tests of (a) K-mesh and (b) vacuum thickness.

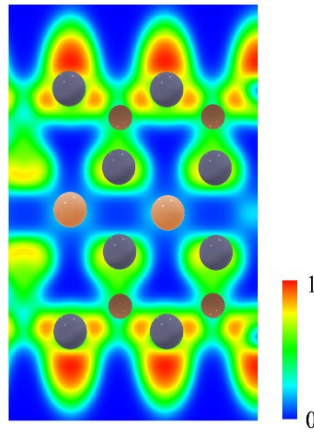

Fig. S2. Electron localization function of monolayer VC<sub>2</sub>N<sub>4</sub>.

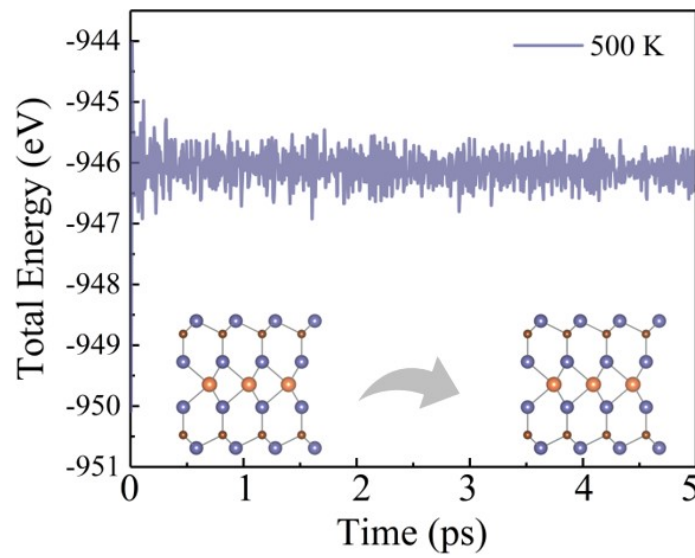

Fig. S3. Evolution of the total energy during 5 ps from AIMD simulation at 500 K; insets show the snapshots of initial and final structures of monolayer VC<sub>2</sub>N<sub>4</sub>.

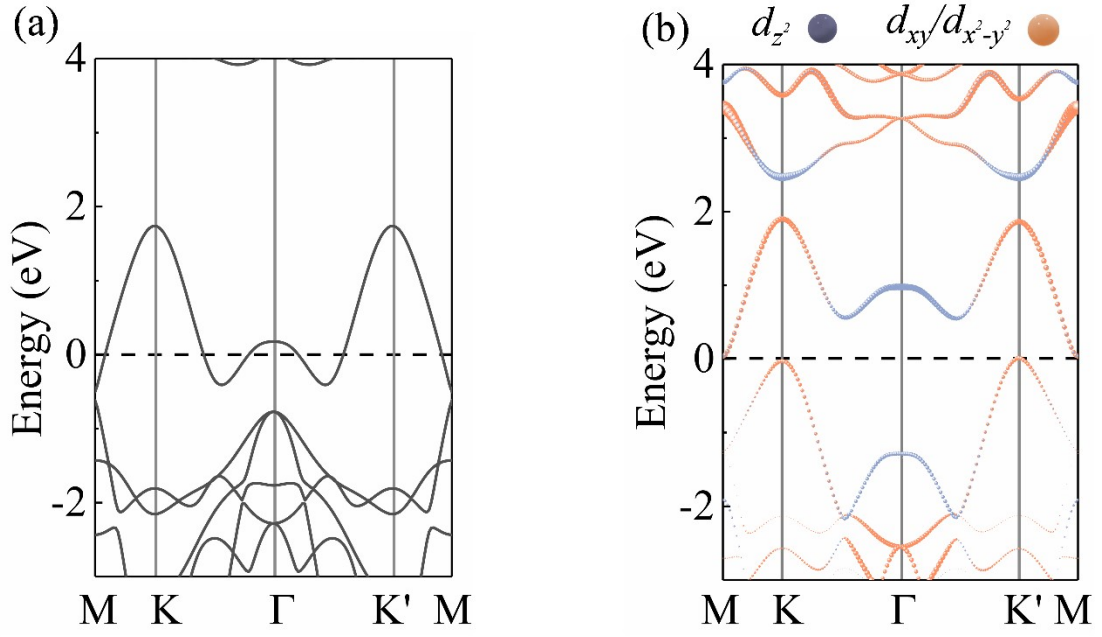

Fig. S4. (a) Band structure of monolayer VC<sub>2</sub>N<sub>4</sub> without spin polarization and SOC. (b) Orbital-resolved band structures of monolayer VC<sub>2</sub>N<sub>4</sub> with spin polarization and SOC.

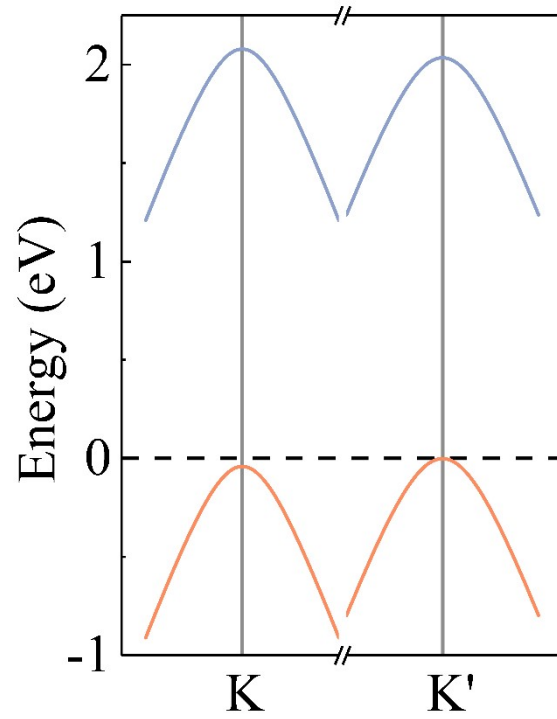

Fig. S5. Low-energy electronic bands around K and K' valleys based on the tight-binding models. The orange and blue lines are spin-up and spin-down states, respectively.

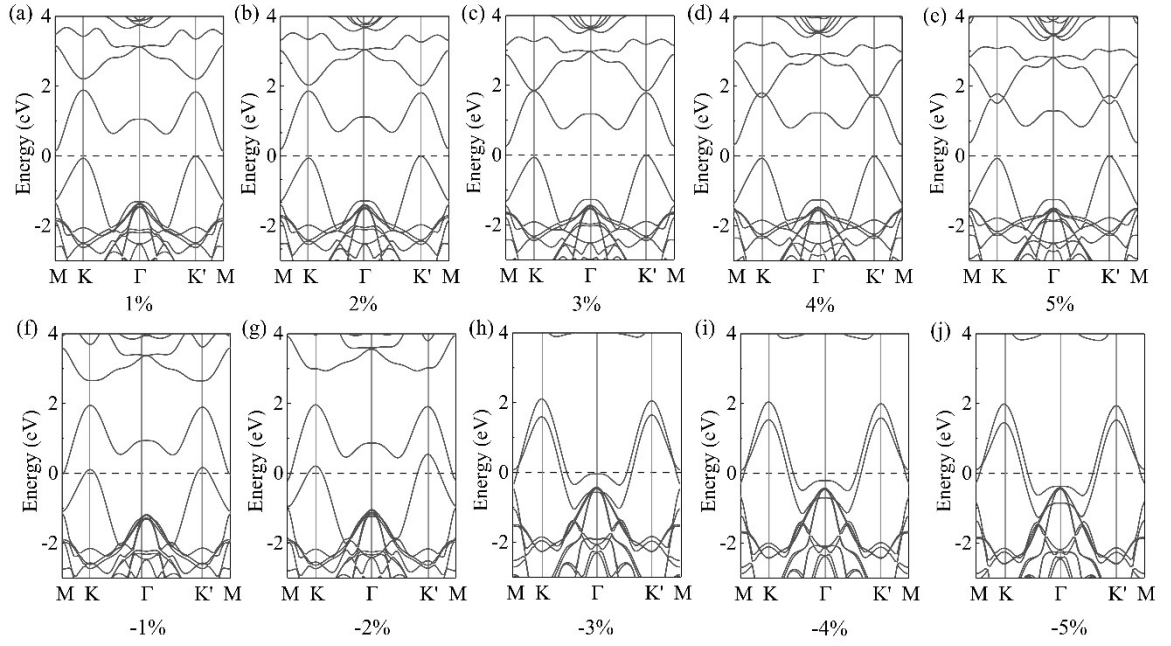

Fig. S6. Band structures of monolayer  $\text{VC}_2\text{N}_4$  with SOC under different strains.

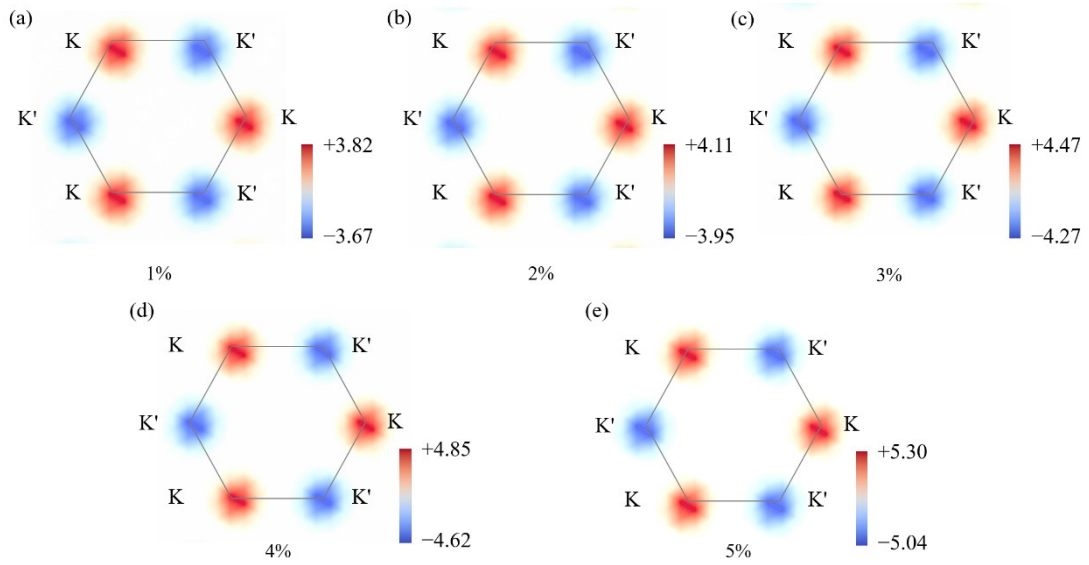

Fig. S7. Berry curvature of VB as a contour map over the 2D BZ for monolayer  $\text{VC}_2\text{N}_4$  under different strains.
